# Supplementary material for: Assessment of acid catalytic properties of ferrosilicate MFI zeolite by methanol-to-hydrocarbon conversion
Source: Royal Society of Chemistry journal article supplement (doi:10.1039/d4ra05039h), 2024-01-01
Supplement: d4ra05039h1.pdf [file d4ra05039h1.pdf]

## Supporting Information

# Assessment of Acid Catalytic Properties of Ferrosilicate MFI Zeolite by Methanol-to-Hydrocarbon Conversion

*Hanyoung Park,<sup>†a,b</sup> Gwang-Jin Na,<sup>†c</sup> Jeong-Chul Kim,<sup>d\*</sup> and Ryong Ryoo<sup>c\*</sup>*

<sup>a</sup> Department of Chemistry, Korea Advanced Institute of Science and Technology (KAIST),  
Daejeon 34141, Republic of Korea

<sup>b</sup> Center for Nanomaterials and Chemical Reactions, Institute for Basic Science (IBS),  
Daejeon 34141, Republic of Korea

<sup>c</sup> Department of Energy Engineering, Korea Institute of Energy Technology (KENTECH),  
Naju, Jeonnam 58330, Korea

<sup>d</sup> Department Chemical and Biological Engineering, Hanbat National University, 125  
Dongseo-daero, Yuseong-gu, Daejeon 34158, Republic of Korea

<sup>†</sup> These authors contributed equally to this work.

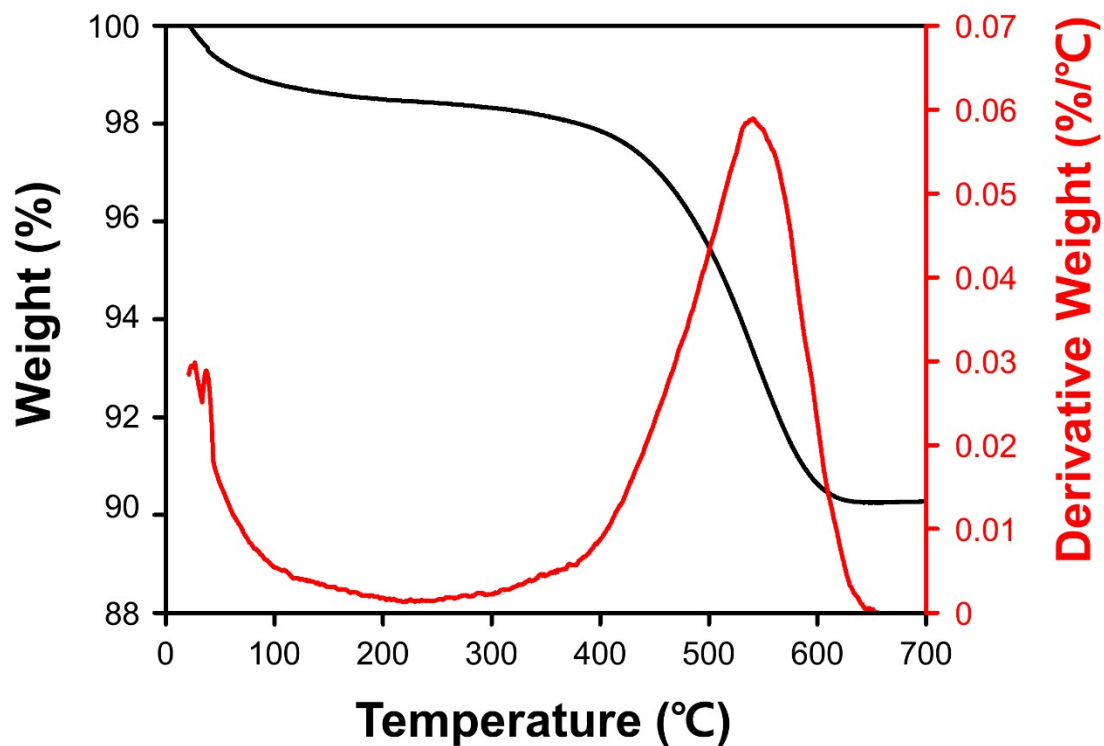

**Figure S1.** Thermogravimetric analysis (TGA) data of the fully deactivated  $\text{MFI}_{\text{TPAOH}/(\text{TEOS}+\text{Fe})}$  catalyst after the methanol-to-hydrocarbon reaction. The data was obtained by flowing the 40:60 mixture of  $\text{N}_2$  and air gases by  $100 \text{ cm}^3 \text{ min}^{-1}$ , while heating the sample to 973 K at a ramping rate of  $10 \text{ K min}^{-1}$ .

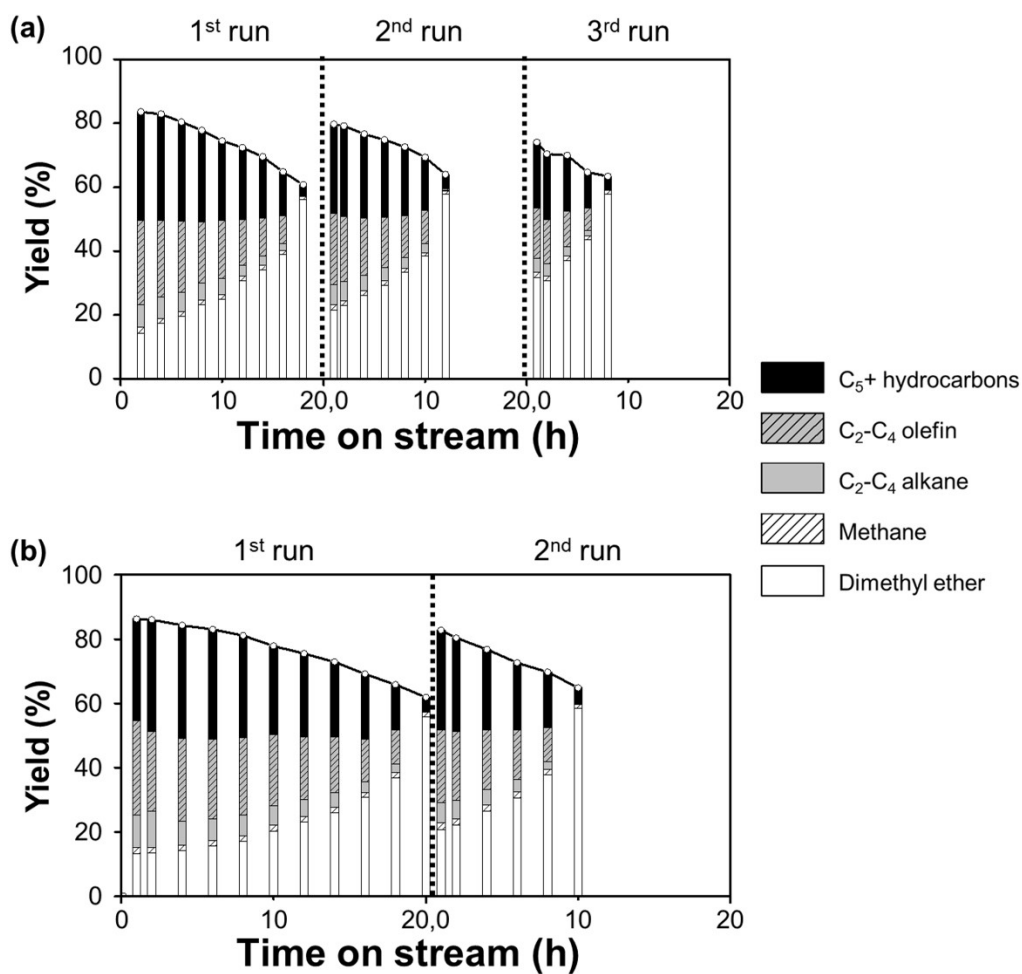

**Figure S2.** Regenerations of the MFI<sub>TPAOH</sub>/(TEOS+Fe) catalyst in the methanol-to-hydrocarbon reaction. Reaction conditions were as follows: 50 mg catalyst, 400 °C, and WHSV of methanol = 50 h<sup>-1</sup>. The reactivation conditions were as follows: (a) flowing 2 vol% O<sub>2</sub> in N<sub>2</sub> under 500 °C for 2 h, (b) flowing air under 550 °C for 1 h.

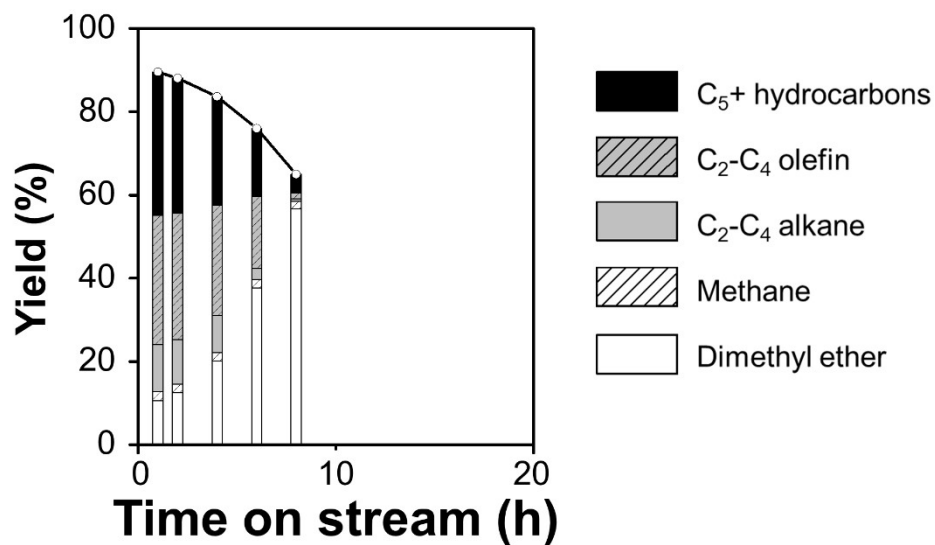

**Figure S3.** The MTH reaction catalytic performance of Fe-MFI synthesized by dropwisely adding H<sub>2</sub>O-TEOS-TPAOH mixture into iron nitrate solution.<sup>[36]</sup> Reaction conditions were as follows: 50 mg catalyst, 400 °C, and WHSV of methanol = 10 h<sup>-1</sup>.

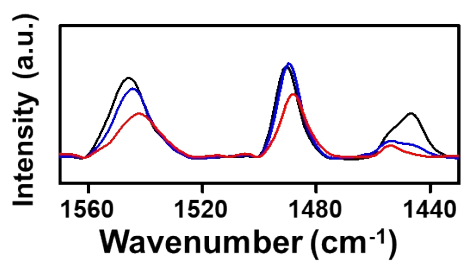

| Zeolite sample       | Brønsted acid site (μmol/g of zeolite) |        |        |
|----------------------|----------------------------------------|--------|--------|
|                      | 150 °C                                 | 300 °C | 500 °C |
| Al-MFI<br>(Si/Al=40) | 174                                    | 148    | 102    |

**Figure S4.** FT-IR spectra of pyridine-adsorbed ZSM-5, and the calculated amount of Brønsted acid sites after the desorption at each temperature. Spectra were measured after the desorption of physisorbed pyridine at 150 °C (black line), 300 °C (blue line) and 500 °C (red line) for 1 h.

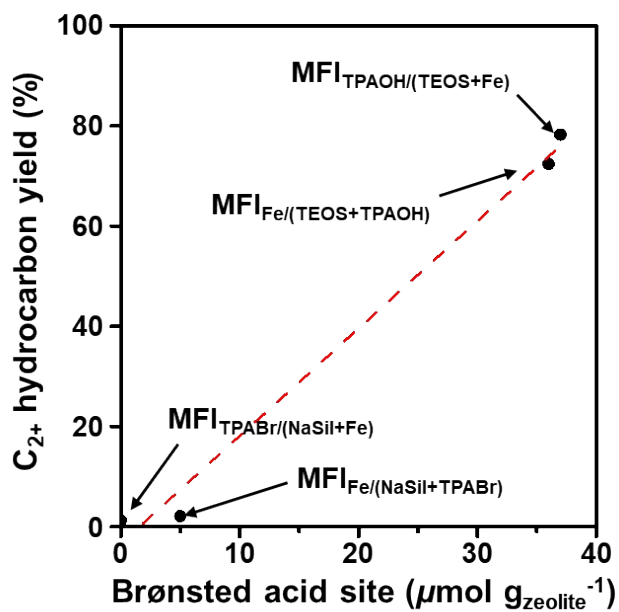

Fig. S5. The amount of Brønsted acid sites of Fe-MFI zeolites measured after the desorption of pyridine at 500 °C, and their  $\text{C}_{2+}$  hydrocarbons yield at 4 h of reaction time-on-stream.

**Table S1.** Relative crystallinity in comparison to the case of purely siliceous MFI zeolite.

|                            | MFI <sub>TPAOH</sub> /(TEOS+Fe) | MFI <sub>Fe</sub> /(TEOS+TPAOH) | MFI <sub>Fe</sub> /(NaSil+TPABr) | MFI <sub>TPABr</sub> /(NaSil+Fe) |
|----------------------------|---------------------------------|---------------------------------|----------------------------------|----------------------------------|
| Relative Crystallinity (%) | 88.7                            | 87.1                            | 91.0                             | 84.5                             |

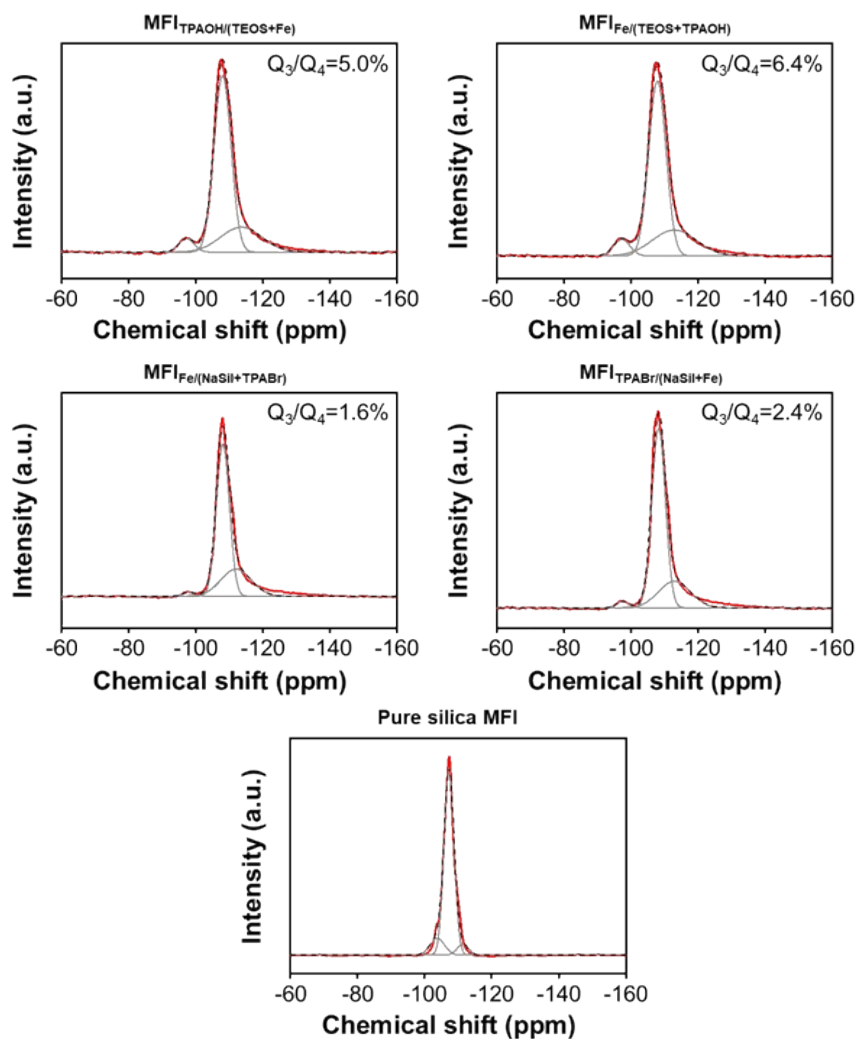

**Figure S6.** Solid state  $^{29}\text{Si}$  MAS NMR spectra of the Fe-MFI zeolites, and purely siliceous MFI zeolite as reference. The measured spectra were drawn in solid red lines, and the calculated proportions of  $Q_3$  over  $Q_4$  were written over each NMR result. Grey curves indicate peak deconvolution, and the black dashed lines illustrate the integration of deconvoluted peaks.



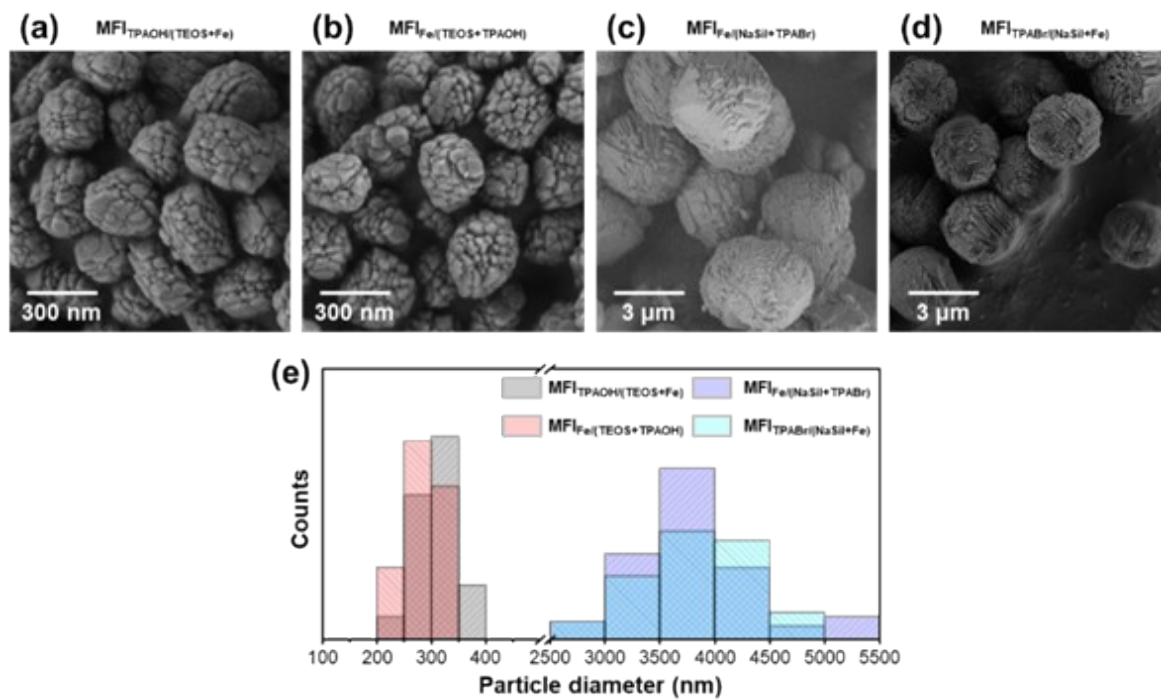

**Figure S7.** SEM images of (a)  $\text{MFI}_{\text{TPAOH}}(\text{TEOS}+\text{Fe})$ , (b)  $\text{MFI}_{\text{Fe}}(\text{TEOS}+\text{TPAOH})$ , (c)  $\text{MFI}_{\text{Fe}}(\text{NaSiI}+\text{TPABr})$  and (d)  $\text{MFI}_{\text{TPABr}}(\text{NaSiI}+\text{Fe})$ , and the (e) particle size distributions of each sample.

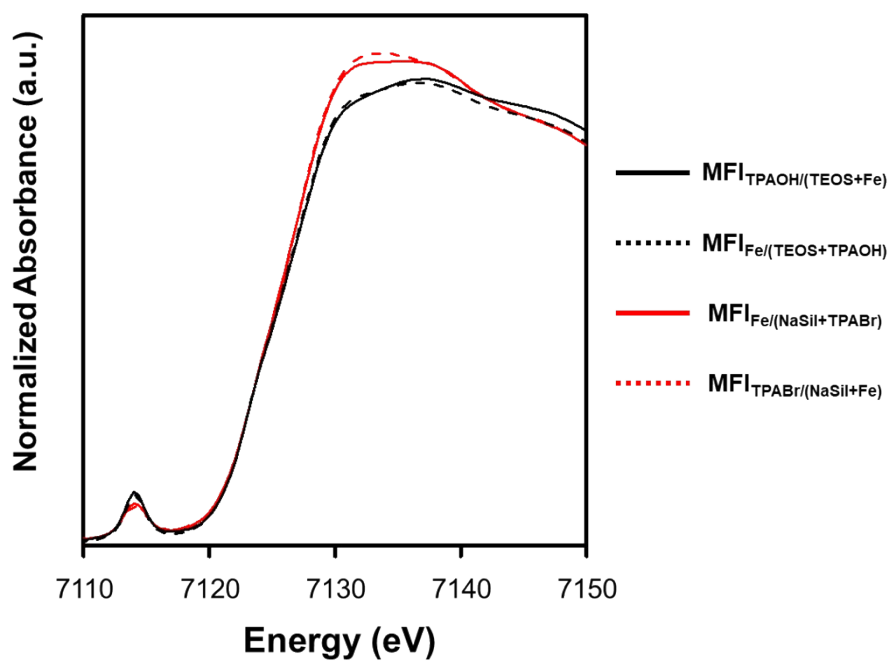

Figure S8. X-ray absorption of Fe-MFI at Fe K-edge region.
